# Supplementary material for: How forest-grassland mosaics structure fruit-feeding butterfly assemblages in the Pampa biome
Source: Research Square preprint supplement (doi:10.21203/rs.3.rs-8437134/v1), 2026-02-12
Supplement: Supplementary file 1 [file 65ba5024da40573d8fa7cf4a.docx]

**How forest-grassland mosaics structure fruit-feeding butterfly assemblages in the Pampa biome**

**Table S1** List of fruit-feeding butterflies species sampled in six localities of the Brazilian Pampa – Alegrete (AL) Eldorado do Sul (ES), Jaguarão (JG), Quaraí (QR), São Gabriel (SG) and Serra do Sudeste (SS) – at grassland and forest habitats. The samples were collected in four field expeditions, between December 2019 and February 2020; between November 2020 and February 2021; in April, November and December of 2023; and in March of 2024 and January of 2025.

|  | Forest | | | | | |  | | Grassland | | | | | | | Total |
| --- | --- | --- | --- | --- | --- | --- | --- | --- | --- | --- | --- | --- | --- | --- | --- | --- |
| Subfamily/Tribe/*Species* | AL | ES | JG | QR | SG | SS | |  | | AL | ES | JG | QR | SG | SS |  |
| Biblidinae | 3 | 4 | 24 | 27 | 22 | 1 | |  | | 6 |  | 4 | 3 | 4 | 66 | 164 |
| Ageroniini |  | 1 |  | 1 | 7 |  | |  | |  |  |  |  |  |  | 9 |
| *Hamadryas epinome* (C. Felder & R. Felder, 1867) |  |  |  | 1 | 7 |  | |  | |  |  |  |  |  |  | 8 |
| *Hamadryas februa* (Hübner, [1823]) |  | 1 |  |  |  |  | |  | |  |  |  |  |  |  | 1 |
| Biblidini | 3 | 1 |  | 3 | 2 |  | |  | | 2 |  |  |  |  |  | 11 |
| *Biblis hyperia* (Cramer, 1779) | 3 | 1 |  | 3 | 2 |  | |  | | 2 |  |  |  |  |  | 11 |
| Callicorini |  | 1 | 7 | 1 | 2 |  | |  | | 4 |  |  |  |  | 57 | 72 |
| *Catagramma pygas* (Godart, [1824]) |  |  |  |  | 2 |  | |  | |  |  |  |  |  | 3 | 5 |
| *Diaethria candrena* (Godart, [1824]) |  | 1 | 7 | 1 |  |  | |  | | 4 |  |  |  |  | 50 | 63 |
| *Haematera pyrame* (Hübner, [1819]) |  |  |  |  |  | 4 | |  | |  |  |  |  |  |  | 4 |
| Epicaliini |  |  |  |  |  | 1 | |  | |  |  |  |  |  |  | 1 |
| *Catonephele sabrina* (Hewitson, 1852) |  |  |  |  |  | 1 | |  | |  |  |  |  |  |  | 1 |
| Epiphilini |  |  |  |  |  | 1 | |  | |  |  |  |  |  | 1 | 2 |
| *Epiphile hubneri* Hewitson, 1861 |  |  |  |  |  | 1 | |  | |  |  |  |  |  | 1 | 2 |
| Eunicini |  | 1 | 17 | 22 | 11 |  | |  | |  |  | 4 | 3 | 4 | 7 | 69 |
| *Eunica eburnea* Fruhstorfer, 1907 |  | 1 | 17 | 12 | 9 |  | |  | |  |  | 4 |  | 1 | 7 | 51 |
| *Eunica tatila* (Herrich-Schäffer, [1855]) |  |  |  | 10 | 2 |  | |  | |  |  |  | 3 | 3 |  | 18 |
| Charaxinae | 1 | 13 | 26 | 31 | 28 | 10 | |  | | 1 |  |  |  | 2 | 29 | 141 |
| Anaeini |  | 8 | 23 | 31 | 12 | 7 | |  | | 1 |  |  |  | 2 | 23 | 107 |
| *Memphis moruus* (Fabricius, 1775) |  | 4 | 3 | 30 | 4 | 2 | |  | | 1 |  |  |  |  |  | 44 |
| *Zaretis strigosus* (Gmelin, [1790]) |  | 4 | 20 | 1 | 8 | 5 | |  | |  |  |  |  | 2 | 23 | 63 |
| Preponini | 1 | 5 | 3 |  | 16 | 3 | |  | |  |  |  |  |  | 6 | 34 |
| *Archaeoprepona amphimachus* (Fabricius, 1775) |  | 1 |  |  |  | 1 | |  | |  |  |  |  |  | 5 | 7 |
| *Archaeoprepona demophon* (Linnaeus, 1758) | 1 | 2 |  |  | 16 |  | |  | |  |  |  |  |  |  | 19 |
| *Archaeoprepona demophoon* (Hübner, [1814]) |  | 2 |  |  |  | 1 | |  | |  |  |  |  |  | 1 | 4 |
| *Prepona pylene* Hewitson, [1854] |  |  | 3 |  |  | 1 | |  | |  |  |  |  |  |  | 4 |
| Nymphalinae |  | 2 |  |  |  |  | |  | |  | 4 |  |  | 1 | 1 | 8 |
| Coeini |  | 1 |  |  |  |  | |  | |  |  |  |  | 1 |  | 2 |
| *Historis achaeronta* (Fabricius, 1775) |  | 1 |  |  |  |  | |  | |  |  |  |  | 1 |  | 2 |
| Nymphalini |  |  |  |  |  |  | |  | |  |  |  |  |  |  | 0 |
| *Smyrna blomfildia* (Fabricius, 1781) |  | 1 |  |  |  |  | |  | |  | 4 |  |  |  | 1 | 6 |
| Satyrinae | 496 | 204 | 1150 | 2144 | 399 | 55 | |  | | 46 | 66 | 42 | 257 | 159 | 155 | 5173 |
| Brassolini |  | 7 | 9 |  | 2 | 15 | |  | |  |  |  |  |  | 2 | 35 |
| *Blepolenis batea* (Hübner, [1821]) |  |  | 3 |  |  |  | |  | |  |  |  |  |  |  | 3 |
| *Caligo martia* (Godart, [1824]) |  |  |  |  |  | 2 | |  | |  |  |  |  |  |  | 2 |
| *Dinastor darius* (Fabricius, 1775) |  |  |  |  | 2 |  | |  | |  |  |  |  |  |  | 2 |
| *Eryphanis reevesii* (E. Doubleday, [1849]) |  | 5 |  |  |  | 7 | |  | |  |  |  |  |  | 1 | 13 |
| *Narope cyllastros* E. Doubleday, [1849] |  | 1 |  |  |  |  | |  | |  |  |  |  |  |  | 1 |
| *Opoptera aorsa* (Godart, [1824]) |  | 1 |  |  |  |  | |  | |  |  |  |  |  |  | 1 |
| *Opoptera sulcius* (Staudinger, 1887) |  |  |  |  |  | 5 | |  | |  |  |  |  |  |  | 5 |
| *Opsiphanes invirae* (Hübner, [1808]) |  |  | 6 |  |  | 1 | |  | |  |  |  |  |  | 1 | 8 |
| Morphini |  |  | 7 | 29 |  | 31 | |  | |  |  |  |  |  |  | 67 |
| *Morpho epistrophus* (Fabricius, 1796) |  |  | 7 | 29 |  | 31 | |  | |  |  |  |  |  |  | 67 |
| Satyrini | 496 | 197 | 1134 | 2115 | 397 | 9 | |  | | 46 | 66 | 42 | 257 | 159 | 153 | 5071 |
| *Capronnieria galesus* (Godart, [1824]) |  | 3 | 9 |  |  |  | |  | |  |  |  |  |  | 6 | 18 |
| *Carminda paeon* (Godart, 1824) |  | 5 | 61 |  |  |  | |  | |  |  |  |  |  |  | 66 |
| *Cissia eous* (Butler, 1867) | 71 | 14 |  | 54 | 14 |  | |  | | 3 | 4 |  | 7 | 2 |  | 169 |
| *Cissia phronius* (Godart, [1824]) | 206 | 28 | 249 | 1043 | 184 |  | |  | | 1 |  |  | 16 | 4 | 9 | 1740 |
| *Erichthodes narapa* (Schaus, 1902) |  |  |  |  |  |  | |  | |  | 9 |  |  |  |  | 9 |
| *Forsterinaria quantius* (Godart, [1824]) |  |  |  |  |  | 7 | |  | |  |  |  |  |  |  |  |
| *Hermeuptychia sp* Forster, 1964 | 6 | 11 | 42 | 49 | 22 | 1 | |  | | 1 | 2 |  | 11 |  | 2 | 147 |
| *Moneuptychia soter* (Butler, 1877) | 10 | 24 | 106 | 112 | 28 |  | |  | | 2 | 1 |  |  |  |  | 283 |
| *Paryphthimoides poltys* (Prittwitz, 1865) | 201 | 73 | 663 | 832 | 114 | 1 | |  | | 1 |  |  |  |  |  | 1885 |
| *Paryphthimoides vestigiata* (A. Butler, 1867) | 1 |  |  |  |  |  | |  | |  |  |  |  |  | 1 | 2 |
| *Stegosatyrus periphas* (Godart, [1824]) |  |  |  |  |  |  | |  | |  | 1 |  | 1 |  |  | 2 |
| *Taygetis ypthima* Hübner, [1821] |  | 3 |  | 1 |  |  | |  | |  |  |  |  |  |  | 4 |
| *Yphthimoides affinis* (A. Butler, 1867) |  |  |  |  |  |  | |  | |  | 1 |  |  |  |  | 1 |
| *Yphthimoides celmis* (Godart, 1824]) | 1 | 2 | 4 | 24 | 35 |  | |  | | 38 |  | 42 | 222 | 153 | 135 | 656 |
| *Yphthimoides ochracea* (A. Butler, 1867) |  | 24 |  |  |  |  | |  | |  | 48 |  |  |  |  | 72 |
| *Yphthimoides ordinaria* Freitas, Kaminski & Mielke, 2012 |  | 10 |  |  |  |  | |  | |  |  |  |  |  |  | 10 |
| Total |  |  |  |  |  |  | |  | |  |  |  |  |  |  | 5486 |
